# Supplementary material
Source: PubMed Central journal article supplement (PMC9295545)
Supplement: aac.00301-22-s0001.pdf [file aac.00301-22-s0001.pdf]

**TABLE S1** Primers for amplification and sequencing of quinolone resistance–determining regions

| <b>Primer</b>  | <b>Sequence (5' to 3' )</b> | <b>Amplicon size (bp)</b> |
|----------------|-----------------------------|---------------------------|
| <i>gyrA</i> -f | GTTATCGTGTCCAGAGCG          | 446                       |
| <i>gyrA</i> -r | CCGCAATACCGGAAGTACCA        |                           |
| <i>gyrB</i> -f | ATACGCACGAAGGAGGTACG        | 847                       |
| <i>gyrB</i> -r | CGCTCTTTCTCGTTCCATGC        |                           |
| <i>parC</i> -f | TGGTTTCTGGATTATGCCTCTT      | 446                       |
| <i>parC</i> -r | CCTACACCAATCCCTTCTACTCC     |                           |
| <i>parE</i> -f | AAGAGCCAGAAACATCAGAGG       | 819                       |
| <i>parE</i> -r | TTCTTTTCTTTCGATGTCCGTA      |                           |

**TABLE S2** Mutations in the quinolone resistance–determining regions of all *E. anophelis* isolates

| Strain no. | Pre-existing mutations |      |      | Ciprofloxacin-induced mutations |      |      | Levofloxacin-induced mutations |       |      |
|------------|------------------------|------|------|---------------------------------|------|------|--------------------------------|-------|------|
|            | GyrA                   | GyrB | ParC | GyrA                            | GyrB | ParC | GyrA                           | GyrB  | ParC |
| ED72-72    |                        |      |      | S83I/R <sup>a</sup>             |      |      | G81D                           |       |      |
| ED861-69   |                        |      |      | S83I                            |      |      | G81D                           |       |      |
| ED863-79   |                        |      |      | S83I                            |      |      | G81D                           |       |      |
| ED919-93   |                        |      |      | S83I                            |      |      | G81D                           |       |      |
| ED943-07   | S83I                   |      |      |                                 |      |      | S83I                           | D431H |      |
| ED945-17   |                        |      |      | S83I                            |      |      | G81D, S83I                     |       |      |
| ED960-64   |                        |      |      | S83I                            |      |      | G81D                           |       |      |
| ED981-34   | S83I                   |      |      |                                 |      |      | S83I                           |       |      |
| ED984-29   | S83I                   |      |      |                                 |      |      | S83I                           |       |      |
| ED986-96   | S83I                   |      |      |                                 |      |      | S83I                           |       |      |
| ED989-63   |                        |      |      | S83I                            |      |      | G81D, S83I                     |       |      |
| ED990-96   |                        |      |      | S83I                            |      |      | G81D                           |       |      |
| ED991-03   |                        |      |      | S83I                            |      |      | G81D, S83I                     |       |      |
| ED993-93   |                        |      |      | S83I/R <sup>a</sup>             |      |      | G81D, S83I                     |       |      |
| ED998-58   |                        |      |      | S83I                            |      |      | G81D, S83I                     |       |      |
| ED999-65   |                        |      |      | S83I                            |      |      | G81D, S83I                     |       |      |
| ED1006-53  |                        |      |      | S83I                            |      |      | G81D                           |       |      |
| ED1022-35  |                        |      |      | S83I                            |      |      | S83I                           |       |      |
| ED1023-67  |                        |      |      | S83R                            |      |      | G81D                           |       |      |

---

|           |      |       |            |            |       |
|-----------|------|-------|------------|------------|-------|
| ED1027-67 |      | P134T | S83I       | G81D, S83I |       |
| ED1037-10 | S83I |       |            | S83I       | D431H |
| ED1042-67 |      |       | S83R, S84P | G81D       |       |
| ED1048-16 |      |       | S83I       | G81D       |       |
| ED1049-50 |      |       | S83I       | S83I       |       |
| ED1050-03 |      |       | S83I       | D82N, S83I |       |
| ED1054-01 |      |       | S83I       | G81D, S83I |       |
| ED1064-93 |      |       | S83I       | G81D       |       |
| ED1065-50 |      |       | S83I       | G81D       |       |
| EDC15-70  |      |       | S83I       | G81D       |       |
| EDC23-98  | S83R |       |            | S83R, D87Y | D431N |
| EDC32-52  | S83I |       |            | S83I       |       |
| EDC41-75  |      |       | S83I       | G81D       |       |
| EDC44-32  |      |       | S83I       | G81D       |       |
| EDC45-72  |      |       | S83R       | G81D, S83I |       |
| EDC46-69  |      |       | S83I       | G81D       |       |
| EDC49-25  |      |       | S83I       | G81D       |       |
| EDC52-15  |      |       | S83I       | G81D       |       |
| VGHTC2    | S83I |       |            | S83I       | D431H |
| VGHTC3    |      |       | S83I       | G81D       |       |
| VGHTC6    | S83I |       |            | S83I       | D431H |
| VGHTC9    |      |       | S83R, D87H | G81D       |       |

---

---

|         |      |                  |            |       |
|---------|------|------------------|------------|-------|
|         |      | S83I             | G81D       |       |
| VGHTC11 | S83I |                  | S83I       | D431H |
| VGHTC12 | S83I |                  | S83I, D87N | D431H |
| KMUH14  |      | S83I             | G81D       |       |
| KMUH16  |      | S83I             | G81D       |       |
| KMUH17  |      | S83I             | G81D       |       |
| KMUH20  |      | S83I             | G81D       |       |
| KMUH23  |      | S83I             | G81D, S83I |       |
| KMUH25  |      | S83I             | G81D       |       |
| KNUH26  |      | S83I             | S83I       |       |
| KMUH28  |      | S83I             | G81D       |       |
| KMUH35  |      | S83I             | G81D       |       |
| KMUH37  |      | H78Y, S83I, D87Y | G81D       |       |
| KMUH39  | S83R |                  | S83R, D87Y |       |
| KMUH40  |      | S83I             | G81D       |       |
| KMUH42  |      | S83I             | G81D       |       |
| KMUH43  | S83I |                  | S83I       |       |
| KMUH46  |      | S83I             | G81D       |       |
| KMUH47  |      | S83I             | G81D       |       |
| KMUH48  | S83I |                  | S83I       |       |
| KMUH49  | S83I |                  | S83I       | D431H |
| KMUH50  |      | S83I             | G81D       |       |
| KMUH51  | S83I |                  | S83I       |       |

---

---

|        |      |            |            |       |
|--------|------|------------|------------|-------|
| KMUH52 |      | S83I       | G81D       |       |
| KMUH54 |      | S83I       | G81D       |       |
| KMUH56 | S83I |            | S83I       | D431H |
| KMUH57 |      | S83I       | G81D, S83I |       |
| KMUH59 |      | S83R, D87Y | G81D       |       |
| KMUH60 |      | S83I       | G81D       |       |
| NCKU61 |      | S83I       | G81D       |       |
| NCKU62 |      | S83I       | G81D       |       |
| NCKU63 |      | A119K      | G81D       |       |
| NCKU64 |      | S83I       | G81D       |       |
| NCKU65 | D87Y | S83I, D87Y | S83R, D87Y |       |
| NCKU66 |      | S83I       | G81D       |       |
| NCKU67 |      | S83I       | G81D       |       |
| NCKU68 |      | S83I       | G81D       |       |
| NCKU69 |      | S83I       | G81D       |       |
| NCKU70 |      | S83I       | G81D       |       |
| NCKU71 |      | S83I       | G81D       |       |
| NCKU72 |      | S83I       | G81D       |       |
| NCKU73 |      | S83I       | G81D       |       |
| NCKU74 |      | S83I       | G81D       |       |
| NCKU75 |      | S83I       | G81D       |       |

---

<sup>a</sup>Nucleotide mutation detected in different colonies of the same isolate.
